# Supplementary material for: Comparative safety and effectiveness of cognitive enhancers for Alzheimer's dementia: protocol for a systematic review and individual patient data network meta-analysis
Source: HighWire-hosted journal article supplement (doi:10.1136/bmjopen-2015-010251), 2016-01-01
Supplement: bmjopen-2015-010251supp.pdf [file bmjopen-2015-010251supp.pdf]

## Appendix 1. MEDLINE Search

Database: Ovid MEDLINE(R) In-Process & Other Non-Indexed Citations and Ovid MEDLINE(R) <1946 to Present>, Embase<1980 to 2014 Week 50> Search Strategy:

---

- 1 alzheimer\$.mp.
- 2 "benign senescent forgetfulness".mp.
- 3 (cognit\$ adj2 (impair\$ or declin\$ or deficit\$ or degenerat\$ or deteriorat\$ or los\$ or disorder\$ or complain\$ or disturb\$)).mp.
- 4 (cerebr\$ adj2 (impair\$ or declin\$ or deficit\$ or degenerat\$ or deteriorat\$ or los\$ or disorder\$ or complain\$ or disturb\$)).mp.
- 5 (mental adj2 (impair\$ or declin\$ or deficit\$ or degenerat\$ or deteriorat\$ or los\$ or disorder\$ or complain\$ or disturb\$)).mp.
- 6 (ne?rocognit\$ adj2 (impair\$ or declin\$ or deficit\$ or degenerat\$ or deteriorat\$ or los\$ or disorder\$ or complain\$ or disturb\$)).mp.)
- 7 (ne?ro-cognit\$ adj2 (impair\$ or declin\$ or deficit\$ or degenerat\$ or deteriorat\$ or los\$ or disorder\$ or complain\$ or disturb\$)).mp.
- 8 ((cognit\$ or memory or cerebral or brain) adj2 (improv\$ or enhanc\$ or perform\$ or process\$ or function\$ or rehabilitation or aid\$ or stimulat\$)).mp.
- 9 cognition.ti.
- 10 (confusion\$ or confused).tw.
- 11 dement\$.mp.
- 12 ("normal pressure hydrocephalus" and shunt\$).mp.
- 13 "organic brain disease\$.mp.
- 14 "organic brain syndrome".mp.
- 15 (presenil\$ or pre-senil\$ or senil\$).tw.
- 16 Alzheimer Disease/
- 17 Cognition/de
- 18 Confusion/
- 19 Dementia/
- 20 or/1-19
- 21 abixa.tw.
- 22 aricept.tw.
- 23 (acetylcholinesteraseadj inhibitor\$).tw.
- 24 axura.tw.
- 25 akatinol.tw.
- 26 (anticholinesterase? or anti-cholinesterase?).tw.
- 27 (cognitive adjenhanc\$).mp.
- 28 (cholinesterase adj inhibitor\$).mp.
- 29 ChEI.tw.

30 donepezil.mp.  
31 ebixa.tw.  
32 eranz.tw.  
33 exelon.tw.  
34 galant?amin\$.tw.  
35 lycoremine.tw.  
36 memantin\$.tw.  
37 memox.tw.  
38 namenda.tw.  
39 nimvastid.tw.  
40 nivalin\$.tw.  
41 "N-Methyl-D-aspartic acid receptor antagonist\$.tw.  
42 prometax.tw.  
43 razadyne.tw.  
44 reminyl.tw.  
45 rivastigmine.mp.  
46 exp Cholinesterase Inhibitors/  
47 Galantamine/  
48 Memantine/  
49 Galantamin.rn.  
50 Memantine.rn.  
51 Donepezil.rn.  
52 Donepezil Hydrochloride.rn.  
53 Rivastigmine.rn.  
54 or/21-53  
55 20 and 54  
56 exp Animals/ not (exp Animals/ and Humans/)  
57 55 and 56  
58 (comment or editorial or interview or news).pt.  
59 (letter not (letter and randomized controlled trial)).pt.  
60 57 not (58 or 59)  
61 (201111\* or 201112\* or 2012\* or 2013\* or 2014\*).ed.  
62 60 and 61  
63 alzheimer\$.mp.  
64 "benign senescent forgetfulness".mp.  
65 (cognit\$ adj2 (impair\$ or declin\$ or deficit\$ or degenerat\$ or deteriorat\$ or los\$ or disorder\$ or complain\$ or disturb\$)).mp.  
66 (cerebr\$ adj2 (impair\$ or declin\$ or deficit\$ or degenerat\$ or deteriorat\$ or los\$ or disorder\$ or complain\$ or disturb\$)).mp.

67 (mental adj2 (impair\$ or declin\$ or deficit\$ or degenerat\$ or deteriorat\$ or los\$ or disorder\$ or complain\$ or disturb\$)).mp.

68 (ne?rocognit\$ adj2 (impair\$ or declin\$ or deficit\$ or degenerat\$ or deteriorat\$ or los\$ or disorder\$ or complain\$ or disturb\$)).mp.

69 (ne?ro-cognit\$ adj2 (impair\$ or declin\$ or deficit\$ or degenerat\$ or deteriorat\$ or los\$ or disorder\$ or complain\$ or disturb\$)).mp.

70 ((cognit\$ or memory or cerebral or brain) adj2 (improv\$ or enhanc\$ or perform\$ or process\$ or function\$ or rehabilitation or aid\$ or stimulat\$)).mp.

71 cognition.ti.

72 (confusion\$ or confused).tw.

73 dement\$.mp.

74 ("normal pressure hydrocephalus" and shunt\$).mp.

75 "organic brain disease\$.mp.

76 "organic brain syndrome".mp.

77 (presenil\$ or pre-senil\$ or senil\$).tw

78 Alzheimer disease/  
79 cognitive defect/  
80 confusion/  
81 dementia/  
82 organic brain syndrome/  
83 or/63-82

84 abixa.tw.

85 aricept.tw.

86 (acetylcholinesteraseadj inhibitor\$).tw.

87 axura.tw.

88 akatinol.tw.

89 (anticholinesterase? or anti-cholinesterase?).tw.

90 (cognitive adjenhanc\$).mp.

91 (cholinesterase adj inhibitor\$).mp.

92 ChEI.tw.

93 donepezil.mp.

94 ebixa.tw.

95 eranz.tw.

96 exelon.tw.

97 galant?amin\$.tw.

98 lycoremine.tw.

99 memantin\$.tw.

100 memox.tw.

101 namenda.tw.

102 nimvastid.tw.

103 nivalin\$.tw.  
104 "N-Methyl-D-aspartic acid receptor antagonist\$.tw.  
105 prometax.tw.  
106 razadyne.tw.  
107 reminyl.tw.  
108 rivastigmine.mp.  
109 exp cholinesterase inhibitor/  
110 donepezil/ or donepezil plus memantine/  
111 galantamine/  
112 memantine/  
113 rivastigmine/  
114 357-70-0.rn.  
115 19982-08-2.rn.  
116 120011-70-3.rn.  
117 120014-06-4.rn.  
118 rivastigmine.rn.  
119 or/84-118  
120 83 and 119  
121 randomized controlled trial/ or controlled clinical trial/  
122 exp "clinical trial (topic)"/  
123 (randomi#ed or randomly or RCT\$1 or placebo\*).tw.  
124 ((singl\* or doubl\* or trebl\* or tripl\*) adj (mask\* or blind\* or dumm\*)).tw.  
125 trial.ti.  
126 or/121-125  
127 120 and 126  
128 exp controlled clinical trial/  
129 exp "controlled clinical trial (topic)"/  
130 (control\* adj2 trial\*).tw.  
131 (nonrandom\* or non-random\* or quasi-random\* or quasi-experiment\*).tw.  
132 (nRCT or nRCTs or non-RCT\$1).tw.  
133 (control\* adj3 ("before and after" or "before after")).tw.  
134 time series analysis/  
135 (time series adj3 interrupt\*).tw.  
136 pretest posttest control group design/  
137 (pre- adj3 post-).tw.  
138 (pretest adj3 posttest).tw.  
139 controlled study/  
140 (control\* adj2 stud\$3).tw.  
141 control group/  
142 (control\$ adj2 group\$1).tw.

143 or/128-142  
144 120 and 143  
145 cohort analysis/  
146 cohort.tw.  
147 retrospective study/  
148 longitudinal study/  
149 prospective study/  
150 (longitudinal or prospective or retrospective).tw.  
151 follow up/  
152 ((followup or follow-up) adj (study or studies)).tw.  
153 observational study/  
154 (observation\$2 adj (study or studies)).tw.  
155 population research/  
156 ((population or population-based) adj (study or studies or analys#s)).tw.  
157 ((multidimensional or multi-dimensional) adj (study or studies)).tw.  
158 exp comparative study/  
159 ((comparative or comparison) adj (study or studies)).tw.  
160 exp case control study/  
161 ((case-control\* or case-based or case-comparison) adj (study or studies)).tw.  
162 or/145-161  
163 120 and 162  
164 127 or 144 or 163  
165 exp animal experimentation/ or exp models animal/ or exp animal experiment/ or  
nonhuman/ or exp vertebrate/  
166 exp humans/ or exp human experimentation/ or exp human experiment/  
167 165 not 166  
168 164 not 167  
169 editorial.pt.  
170 letter.pt.not (letter.pt. and randomized controlled trial/)  
171 168 not (169 or 170)  
172 (2011112\* or 2011113\* or 201112\* or 2012\* or 2013\* or 2014\*).dd.  
173 171 and 172  
174 62 use prmz  
175 173 use emez  
176 174 or 175  
177 remove duplicates from 176  
178 177 use prmz [MEDLINE UNIQUE HITS]  
179 177 use emez [EMBASE UNIQUE HITS]

\*\*\*\*\*
